# Supplementary material for: Autonomic Function Recovery and Physical Activity Levels in Post-COVID-19 Young Adults after Immunization: An Observational Follow-Up Case-Control Study
Source: MDPI journal article supplement (doi:10.3390/ijerph20032251), 2023-01-27
Supplement: s1 [file s1]

# Supplementary Materials

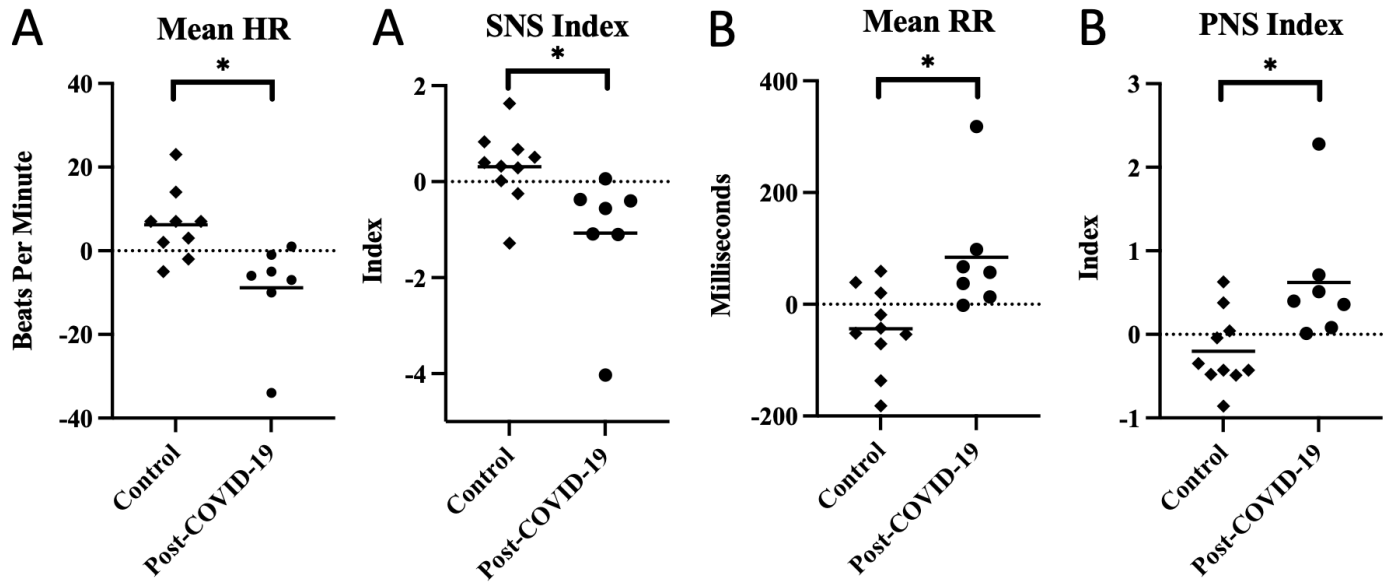

**Figure S1.** Scatterplot of HRV indexes for unpaired analysis according to group expressed as the mean difference between follow-up and baseline moments. (A) Sympathetic nervous system activity; (B) parasympathetic nervous system activity. \* Statistical difference between groups; mean HR: average heart rate measured in beats per minute; SNS Index: sympathetic nervous system index; mean RR: time between.
